# Supplementary material for: Machine learning based multi-modal prediction of future decline toward Alzheimer’s disease: An empirical study
Source: PLOS journal article supplement (doi:10.1371/journal.pone.0277322), 2022-11-16
Supplement: S1 (10.1371/journal.pone.0277322.s001) [file journal.pone.0277322.s001]

**S1 Table. Performance of each model in terms of AUC ROC for CN baseline participants.**

Data format is mean  $\pm$  standard error. LSM<sup>†</sup> is a standard linear ridge regression model that is an alternative implementation of LSM (Linear Single-year Model). NMM<sup>†</sup> is a slight modification of NMM (Nonlinear Multi-year Model), where the input time-to-follow-up ( $\Delta t$ ) feature is encoded as the closest annual visit time. NSM: Nonlinear Single-year Model.

| Follow-up year | CN baseline      |                  |                  |                  |                  |
|----------------|------------------|------------------|------------------|------------------|------------------|
|                | LSM <sup>†</sup> | LSM              | NSM              | NMM              | NMM <sup>†</sup> |
| 1              | 80.66 $\pm$ 0.72 | 83.88 $\pm$ 0.68 | 88.73 $\pm$ 0.45 | 90.4 $\pm$ 0.32  | 89.94 $\pm$ 0.33 |
| 2              | 78.45 $\pm$ 0.47 | 79.41 $\pm$ 0.50 | 84.32 $\pm$ 0.47 | 86.28 $\pm$ 0.34 | 86.37 $\pm$ 0.33 |
| 3              | 80.83 $\pm$ 0.41 | 81.99 $\pm$ 0.38 | 85.24 $\pm$ 0.34 | 85.78 $\pm$ 0.35 | 85.72 $\pm$ 0.35 |
| 4              | 77.39 $\pm$ 0.49 | 78.66 $\pm$ 0.42 | 81.07 $\pm$ 0.38 | 81.98 $\pm$ 0.39 | 82.08 $\pm$ 0.38 |
| 5              | 80.84 $\pm$ 0.43 | 81.22 $\pm$ 0.42 | 82.10 $\pm$ 0.39 | 84.08 $\pm$ 0.38 | 84.23 $\pm$ 0.37 |
